# Supplementary material for: Genetic testing for indeterminate thyroid cytology: review and meta-analysis
Source: PubMed Central journal article supplement (PMC5799829; doi:10.1530/erc-17-0405), 2017-12-18
Supplement: erc-25-R163-t001.pdf [file erc-25-R163-t001.pdf]

|                  |               |
|------------------|---------------|
| <b>TEST NAME</b> | <b>TEST X</b> |
|------------------|---------------|

|                          |                          |
|--------------------------|--------------------------|
| <b>Article Title</b>     | Accuracy Study of Test X |
| <b>Authors (first 3)</b> | XX, YY, ZZ               |
| <b>Year</b>              | 2015                     |

| <b>MT Stage</b>           | <b>YES</b> | <b>NO</b> |
|---------------------------|------------|-----------|
| <b>Technical Efficacy</b> |            | X         |
| <b>Anaytical Validity</b> |            | X         |
| <b>Clinical Validity</b>  | X          |           |
| <b>Clinical Utility</b>   |            | X         |
| <b>Cost-Efectiveness</b>  |            | X         |

**ADEQUACY OF REPORTING (ADAPTED FROM STARD CHECKLIST)**

| <b>Assessment Question</b> | <b>YES</b> | <b>NO</b> | <b>N/A</b> | <b>Commentary</b> |
|----------------------------|------------|-----------|------------|-------------------|
|----------------------------|------------|-----------|------------|-------------------|

|                                                                                          |                                                                                                                                   |                                                                                                       |   |   |  |
|------------------------------------------------------------------------------------------|-----------------------------------------------------------------------------------------------------------------------------------|-------------------------------------------------------------------------------------------------------|---|---|--|
| <b>Title</b>                                                                             | Is the study identified as a diagnosis accuracy one, with at least one measure of accuracy? (e.g. Sn, Sp, Predictive Values, AUC) |                                                                                                       | X |   |  |
| <b>Abstract</b>                                                                          | Is there a strutured summary of design, methods, results and conclusion?                                                          |                                                                                                       | X |   |  |
| <b>Introduction</b>                                                                      | Is there a scientific and clinical background, including intended use and clinical role?                                          | X                                                                                                     |   |   |  |
|                                                                                          | Are the objectives and hypothesis specified?                                                                                      | X                                                                                                     |   |   |  |
| <b>Methods</b>                                                                           | <b>Study Design</b>                                                                                                               | Was data collection performed prospectively?                                                          | X |   |  |
|                                                                                          | <b>Participants</b>                                                                                                               | Are inclusion and exclusion criteria clearly specified?                                               | X |   |  |
|                                                                                          |                                                                                                                                   | How the enrollment was performed?                                                                     | X |   |  |
|                                                                                          |                                                                                                                                   | Is the cohort formed by a consecutive collection of patients, instead a random or convenience seires? | X |   |  |
|                                                                                          | <b>Test Methods</b>                                                                                                               | Is the index test detailed as much as to allow its replication?                                       | X |   |  |
|                                                                                          |                                                                                                                                   | Is the reference test detailed as much as to allow its replication?                                   |   | X |  |
|                                                                                          |                                                                                                                                   | Is it explained the rationale for choosing the reference standard?                                    |   | X |  |
|                                                                                          |                                                                                                                                   | (in case of non-training cohorts) Is the cut-off value specified for the index test?                  |   | X |  |
| (in case of non-training cohorts) Is the cut-off value specified for the reference test? |                                                                                                                                   |                                                                                                       |   | X |  |
| Was the index test result unnown when reference was interpreted?                         |                                                                                                                                   |                                                                                                       | X |   |  |

|                                      |                                                                                         |                                                                                                                     |            |           |            |                   |
|--------------------------------------|-----------------------------------------------------------------------------------------|---------------------------------------------------------------------------------------------------------------------|------------|-----------|------------|-------------------|
|                                      | <b>Analysis</b>                                                                         | Was the reference test result unknown when index was interpreted?                                                   | X          |           |            |                   |
|                                      |                                                                                         | Were the methods used to assess accuracy appropriate?                                                               |            | X         |            |                   |
|                                      |                                                                                         | Were the "indeterminate results" properly handled?                                                                  |            | X         |            |                   |
|                                      |                                                                                         | Were "missing data" properly handled?                                                                               |            | X         |            |                   |
|                                      |                                                                                         | There was any analysis of variability in diagnostic accuracy? (differences between training v/s validation results) | X          |           |            |                   |
|                                      |                                                                                         | Was the sample size correctly calculated by statistical methods?                                                    | X          |           |            |                   |
| <b>Results</b>                       | <b>Participants</b>                                                                     | Is there a diagram that shows the flow of participants?                                                             |            | X         |            |                   |
|                                      |                                                                                         | Are the demographic and clinical characteristics properly described?                                                |            | X         |            |                   |
|                                      |                                                                                         | Is the severity of disease detailed?                                                                                |            | X         |            |                   |
|                                      |                                                                                         | Is the distribution of alternative diagnoses detailed?                                                              |            | X         |            |                   |
|                                      |                                                                                         | Is the time interval between index test and reference standard appropriate?                                         |            |           | X          |                   |
|                                      | <b>Test Results</b>                                                                     | Is the cross-tabulation (2 x 2 table) specified for diagnostic accuracy?                                            |            | X         |            |                   |
|                                      |                                                                                         | Is the precision of diagnostic estimates specified?                                                                 |            | X         |            |                   |
|                                      |                                                                                         | Were any adverse effect of performing the tests reported?                                                           | X          |           |            |                   |
| <b>Discussion</b>                    | Were limitations (e.g. sources of bias, uncertainty, potential utility) discussed?      | X                                                                                                                   |            |           |            |                   |
|                                      | Were implication for clinical practice (i.e. intended use and clinical role) discussed? |                                                                                                                     | X          |           |            |                   |
| <b>OVERALL ADEQUACY OF REPORTING</b> | <b>Low</b>                                                                              |                                                                                                                     |            |           |            |                   |
|                                      | X                                                                                       |                                                                                                                     |            |           |            |                   |
| <b>RISK OF BIAS</b>                  |                                                                                         |                                                                                                                     |            |           |            |                   |
| <b>Bias-Assessment Question</b>      |                                                                                         |                                                                                                                     | <b>YES</b> | <b>NO</b> | <b>N/A</b> | <b>Commentary</b> |
| <b>Population</b>                    | <b>Spectrum Effect</b>                                                                  | Was the test performed in a consecutive collected cohort, avoiding Case-Control?                                    | X          |           |            |                   |
|                                      | <b>Context Bias</b>                                                                     | Was the prevalence maintained in a broad range, similar to real prevalence?                                         |            | X         |            |                   |
|                                      | <b>Selection Bias</b>                                                                   | Did the study avoid inappropriate exclusions?                                                                       | X          |           |            |                   |
| <b>Test Protocol</b>                 | <b>Test Execution</b>                                                                   | Was the test execution protocol described?                                                                          | X          |           |            |                   |
|                                      | <b>Test Technology</b>                                                                  | Is the used technology and operators experience controlled?                                                         | X          |           |            |                   |
|                                      | <b>Treatment Paradox</b>                                                                | Was the Reference Test performed with unknowing of MT result?                                                       | X          |           |            |                   |
|                                      | <b>Disease-Progression Bias</b>                                                         | Was the Reference Test performed within a proper time from the MT?                                                  |            |           | X          |                   |

|                                                                 |                                  |                                                                                                                                                                             |             |           |     |            |
|-----------------------------------------------------------------|----------------------------------|-----------------------------------------------------------------------------------------------------------------------------------------------------------------------------|-------------|-----------|-----|------------|
| Verification Procedure                                          | Innapropriate Reference Standard | Is the Reference Test likely to correctly classify the target condition?                                                                                                    |             | X         |     |            |
|                                                                 | Differential Verification Bias   | Is the Reference Test the same between different studies?                                                                                                                   | X           |           |     |            |
|                                                                 | Partial Verification Bias        | Are all the samples verified by the Reference Test?                                                                                                                         | X           |           |     |            |
| Interpretation                                                  | Diagnosis Review Bias            | Is the MT result unnown when Reference Test is interpreted?                                                                                                                 |             |           | X   |            |
|                                                                 | Test Review Bias                 | Is the Reference Test result unknown when MT is interpreted?                                                                                                                | X           |           |     |            |
|                                                                 | Clinical Review Bias             | Is any patients clinical data known when MT nor Reference results is interpreted?                                                                                           |             | X         |     |            |
|                                                                 | Incorporation Bias               | Is the MT result avoided to be used as the final diagnostic?                                                                                                                |             | X         |     |            |
|                                                                 | Observer Variability             | Is the test result simimilarly interpreted by different observers?                                                                                                          | X           |           |     |            |
| Analysis                                                        | Indeterminate Result             | Are uninterpretable results include in the final analysis?                                                                                                                  |             | X         |     |            |
|                                                                 | Threshold Value                  | Is the threshold value the same between different cohorts?                                                                                                                  |             | X         |     |            |
| OVERALL RISK OF BIAS                                            |                                  | Low Risk                                                                                                                                                                    | Medium Risk | High Risk |     |            |
|                                                                 |                                  |                                                                                                                                                                             | X           |           |     |            |
| SAMPLE SIZE                                                     |                                  |                                                                                                                                                                             |             |           |     |            |
| Assessment Question                                             |                                  |                                                                                                                                                                             | YES         | NO        | N/A | Commentary |
| Is the Sample Size correctly calculated by statistical methods? |                                  |                                                                                                                                                                             | X           |           |     |            |
| DATA ANALYSIS                                                   |                                  |                                                                                                                                                                             |             |           |     |            |
| Assessment Question                                             |                                  |                                                                                                                                                                             | YES         | NO        | N/A | Commentary |
| Is the Data Analysis performed by proper statistical methods?   |                                  |                                                                                                                                                                             |             | X         |     |            |
| ETHICS                                                          |                                  |                                                                                                                                                                             |             |           |     |            |
| Assessment Question                                             |                                  |                                                                                                                                                                             | YES         | NO        | N/A | Commentary |
| Are all the ethics issues properly addressed?                   |                                  |                                                                                                                                                                             | X           |           |     |            |
| APPLICABILITY TO THE BODY OF EVIDENCE                           |                                  |                                                                                                                                                                             |             |           |     |            |
| Assess                                                          |                                  |                                                                                                                                                                             | YES         | NO        | N/A | Commentary |
| PICOTS                                                          | Population                       | justification for lumping/split + identification/selection method + inclusion/exclusion criteria + demographic characteristics + pre-test probability + spectrum of disease | X           |           |     |            |

|                              |                                  |                                                                                                                                                                                                    |               |             |  |  |
|------------------------------|----------------------------------|----------------------------------------------------------------------------------------------------------------------------------------------------------------------------------------------------|---------------|-------------|--|--|
|                              | <b>Intervention</b>              | test version + how the test is conducted in practice + who conduct the test in practice + cut-off/thresholds + skills required to interpret the results                                            | X             |             |  |  |
|                              | <b>Comparator</b>                | using of a Gold Standard + alternate tests + management strategy to use the test (replacement, add-on or triage) + comparison with no-testing or usual MT                                          | X             |             |  |  |
|                              | <b>Outcome - Testing Process</b> | accuracy (Sn, Sp, LR's, NPV and PPV, AUC, Diagnostic OR, Accuracy and Error)                                                                                                                       | X             |             |  |  |
|                              | <b>Outcome - Test Result</b>     | clinical outcomes, e.g. earlier diagnosis, earlier intervention, change in care sequence/intensity, change in testing sequence, QALY, costs                                                        | X             |             |  |  |
|                              | <b>Timing</b>                    | time to make results available for care team + placement of MT in sequence of care + timing of follow-up                                                                                           | X             |             |  |  |
|                              | <b>Setting</b>                   | setting of cares (primary v/s speciality) + in-patient v/s out-patient + lab requirements (e.g. centralized, Point of Care, trained personnel) + MT strategy (screening, diagnostic or prognostic) | X             |             |  |  |
| <b>Contextual Factors</b>    | <b>Spectrum Factors</b>          | Is there a possible effect of any of these contextual factors?                                                                                                                                     |               | X           |  |  |
|                              | <b>Management Strategy</b>       |                                                                                                                                                                                                    |               | X           |  |  |
|                              | <b>MT Methods</b>                |                                                                                                                                                                                                    |               | X           |  |  |
|                              | <b>Secular Trends</b>            |                                                                                                                                                                                                    |               | X           |  |  |
|                              | <b>Preventive Care</b>           |                                                                                                                                                                                                    |               | X           |  |  |
|                              | <b>Treatment Trends</b>          |                                                                                                                                                                                                    |               | X           |  |  |
| <b>OVERALL APPLICABILITY</b> |                                  | <b>Low</b>                                                                                                                                                                                         | <b>Medium</b> | <b>High</b> |  |  |
|                              |                                  |                                                                                                                                                                                                    |               | X           |  |  |
